# Supplementary material for: Epigenomic analysis reveals prevalent contribution of transposable elements to cis-regulatory elements, tissue-specific expression, and alternative promoters in zebrafish
Source: HighWire-hosted journal article supplement (doi:10.1101/gr.276052.121), 2022-06-01
Supplement: Supplemental_code.zip [file All TE-derived Alternative Isoforms Statistics.xlsx]

## Sheet: Sheet1
Transcript Name
